# Supplementary material for: Modulation of oxygen vacancies optimized energy storage density in BNT-based ceramics via a defect engineering strategy
Source: Royal Society of Chemistry journal article supplement (doi:10.1039/d4tc02297a), 2024-01-01
Supplement: d4tc02297a1.pdf [file d4tc02297a1.pdf]

## Supporting Information

### **Modulated oxygen vacancies optimized energy storage density in BNT-based ceramics via defect engineering strategy**

Yang Zhang<sup>#1\*</sup>, Yihao Shen<sup>#2</sup>, Luomeng Tang<sup>2</sup>, Jianwen Chen<sup>3\*</sup>, Zhongbin Pan<sup>2\*</sup>

<sup>1</sup>School of Chemical and Materials Engineering, Chaohu University, Hefei 238024, China. Email: zhangyang\_sut@163.com

<sup>2</sup>School of Materials Science and Chemical Engineering, Ningbo University, Ningbo, Zhejiang, 315211, China. E-mail: panzhongbin@163.com

<sup>3</sup>School of Electronic and Information Engineering, Foshan University, Foshan, 528000, China. E-mail: iamjwen@126.com

<sup>#</sup>Y. Zhang and Y. Shen contributed equally to this work.

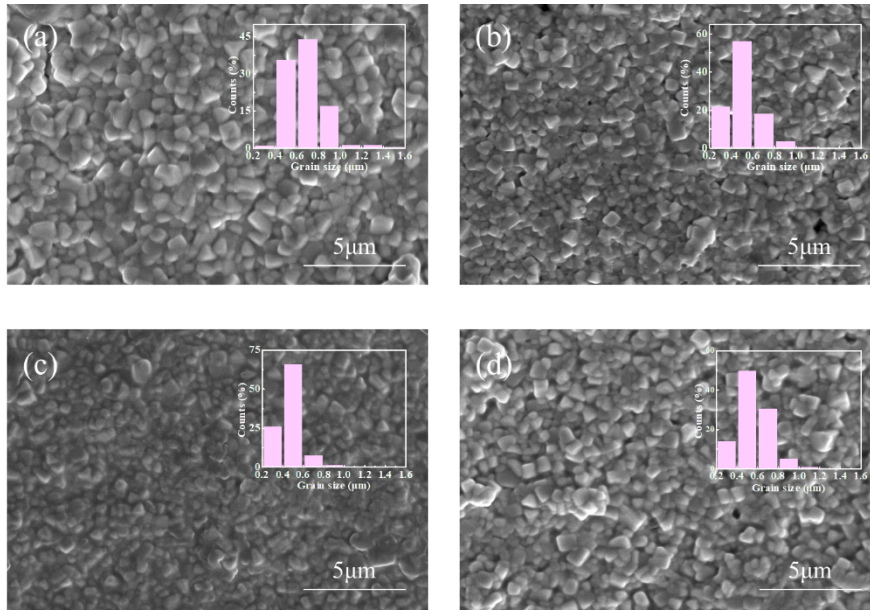

Figure S1 Surface morphology of  $\text{Bi}_{0.3}\text{Na}_{0.3}\text{Sr}_{0.28}\text{Sm}_{0.08}\text{Ti}_{(1-x)}\text{Ta}_x\text{O}_3$  ceramics

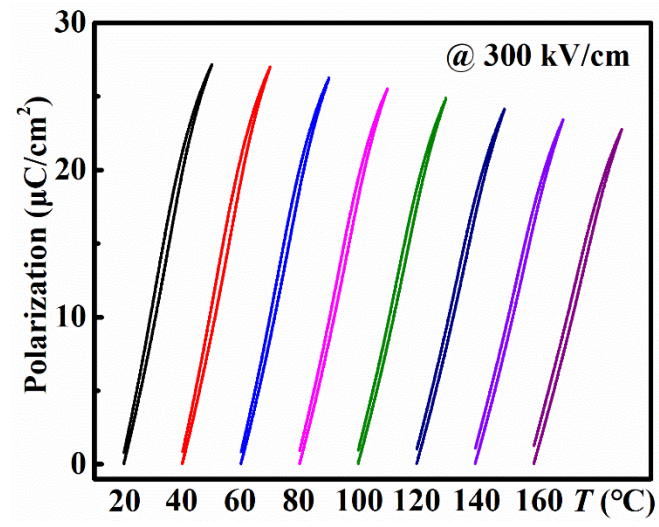

Figure S2 P-E curves with different temperature.

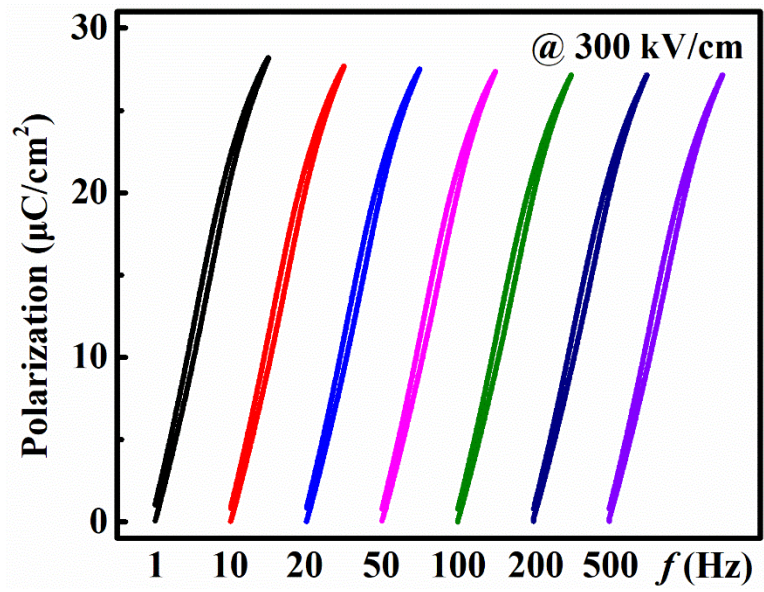

Figure S3 P-E curves with different frequency.

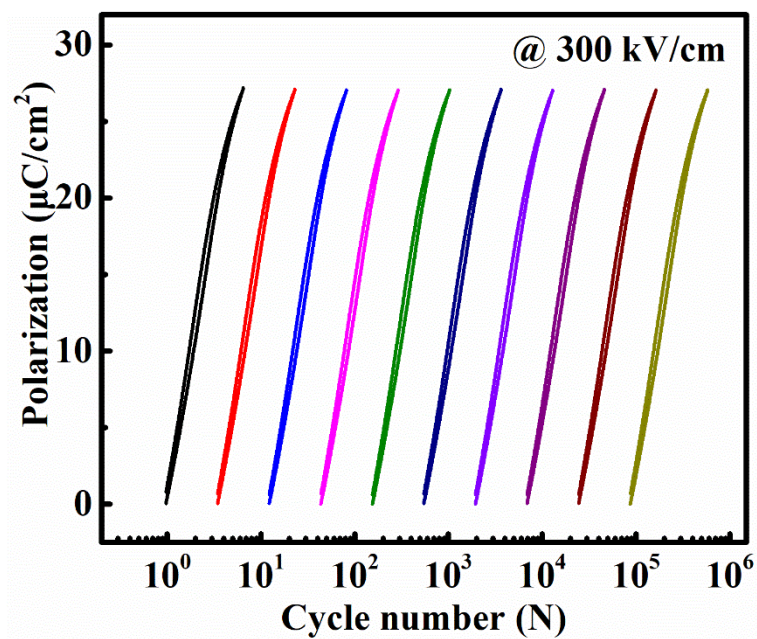

Figure S4 P-E curves with different cycle number.
